# Supplementary material for: Coordination polymers based on 3,3′,4,4′-benzophenone-tetracarboxylate and N-containing pillars: syntheses, structure, characterization and properties
Source: Royal Society of Chemistry journal article supplement (doi:10.1039/c3ce40456k), 2013-01-01
Supplement: c3ce40456k.pdf [file c3ce40456k.pdf]

Fig. S1 Polyhedral view of the Mn(II) ions in I.



Fig. S2 Polyhedral view of the Zn(II) ions in II.



Fig. S3 3D framework assembled by  $\pi$ - $\pi$  interactions between parallel pyridine rings in phen molecules.



Fig. S4 (a) TG-DTG curves of I; (b) TG-DTG curves of II; (c) TG-DTG curves of III.



**a**



**b**

Fig. S5 IR spectrum and XRPD patterns for III: (a) IR spectrum for III taken at room temperature and after the guest-bpy molecules being removed; (b) XRPD patterns for III simulated, at room temperature and after the guest-bpy molecules being removed.
